# Supplementary material for: Assignment of the oxidation states of Zr and Co in a highly reactive heterobimetallic Zr/Co complex using X-ray absorption spectroscopy (XANES)
Source: Royal Society of Chemistry journal article supplement (doi:10.1039/c4dt01534g), 2014-08-05
Supplement: c4dt01534g1.pdf [file c4dt01534g1.pdf]

## SUPPORTING INFORMATION

# Assignment of the Oxidation States of Zr and Co in a Highly Reactive Heterobimetallic Zr/Co Complex Using X-ray Absorption Spectroscopy (XANES)

Jeremy P. Krogman, James R. Gallagher, Guanghai Zhang, Adam S. Hock, Jeffrey T. Miller, Christine M. Thomas

## CONTENTS

|                                                                                                                                                                                         |            |
|-----------------------------------------------------------------------------------------------------------------------------------------------------------------------------------------|------------|
| <b>Table S1.</b> Pre-edge energies at the Co K-edge for additional commercial reference compounds not listed in Table 1.                                                                | <b>S2</b>  |
| <b>Figure S1.</b> Solid state XANES Co K-edge spectra from 7680.0 eV to 7760.0 eV keV of complex <b>1</b> and the Co <sup>I</sup> complex Na[Co(CO) <sub>4</sub> ].                     | <b>S3</b>  |
| <b>Figure S2.</b> Solid state XANES Co K-edge spectra from 7680.0 eV to 7760.0 eV of complex <b>1</b> and the Co <sup>III</sup> complex Co(acac) <sub>3</sub> (acac = acetylacetonate). | <b>S4</b>  |
| <b>Figure S3.</b> Solid state XANES Co K-edge spectrum from 7680.0 eV to 7760.0 eV of complex <b>1</b> (blue) and its first derivative (red).                                           | <b>S5</b>  |
| <b>Figure S4.</b> Solid state XANES Co K-edge spectrum from 7680.0 eV to 7760.0 eV of complex <b>3</b> (blue) and its first derivative (red).                                           | <b>S5</b>  |
| <b>Figure S5.</b> Solid state XANES Co K-edge spectrum from 7680.0 eV to 7760.0 eV of complex <b>4</b> (blue) and its first derivative (red).                                           | <b>S6</b>  |
| <b>Figure S6.</b> Solid state XANES Co K-edge spectrum from 7680.0 eV to 7760.0 eV of complex <b>5</b> (blue) and its first derivative (red).                                           | <b>S6</b>  |
| <b>Figure S7.</b> Solid state XANES Co K-edge spectrum from 7680.0 eV to 7760.0 eV of Na[Co(CO) <sub>4</sub> ] (blue) and its first derivative (red).                                   | <b>S7</b>  |
| <b>Figure S8.</b> Solid state XANES Co K-edge spectrum from 7680.0 eV to 7760.0 eV of ClCo(PPh <sub>3</sub> ) <sub>3</sub> (blue) and its first derivative (red).                       | <b>S7</b>  |
| <b>Figure S9.</b> Solid state XANES Zr K-edge spectrum from 17960.0 eV to 18060.0 eV of complex <b>1</b> (blue) and its first derivative (red).                                         | <b>S8</b>  |
| <b>Figure S10.</b> Solid state XANES Zr K-edge spectrum from 17960.0 eV to 18060.0 eV of complex <b>3</b> (blue) and its first derivative (red).                                        | <b>S8</b>  |
| <b>Figure S11.</b> Solid state XANES Zr K-edge spectrum from 17960.0 eV to 18060.0 eV of complex <b>5</b> (blue) and its first derivative (red).                                        | <b>S9</b>  |
| <b>Figure S12.</b> Solid state XANES Zr K-edge spectrum from 17960.0 eV to 18060.0 eV of complex <b>6</b> (blue) and its first derivative (red).                                        | <b>S9</b>  |
| <b>Gaussian09 Complete Reference</b>                                                                                                                                                    | <b>S10</b> |
| <b>Table S2.</b> Comparison of selected interatomic distances derived from the DFT-optimized geometry and the experimentally determined geometry (X-ray crystallography) of <b>1</b> .  | <b>S11</b> |

**Table S1.** Pre-edge energies at the Co K-edge for compounds in Co oxidation states ranging from +3 to -1, including additional commercial reference compounds not listed in Table 1.

| <b>Sample</b>                                                                           | <b>Oxidation state</b> | <b>Pre-edge energy (eV)</b> |
|-----------------------------------------------------------------------------------------|------------------------|-----------------------------|
| Co(NH <sub>3</sub> ) <sub>6</sub> Cl <sub>3</sub>                                       | 3                      | 7709.7                      |
| LiCoO <sub>2</sub>                                                                      | 3                      | 7709.7                      |
| Co(acac) <sub>3</sub>                                                                   | 3                      | 7709.8                      |
| Co(acac) <sub>2</sub>                                                                   | 2                      | 7709.3                      |
| Co(acetate) <sub>2</sub>                                                                | 2                      | 7709.3                      |
| CoCl <sub>2</sub>                                                                       | 2                      | 7709.2                      |
| CoF <sub>2</sub>                                                                        | 2                      | 7709.2                      |
| ClCo(PPh <sub>3</sub> ) <sub>3</sub>                                                    | 1                      | 7708.4                      |
| ClZr(MesNP <sup>i</sup> Pr <sub>2</sub> ) <sub>3</sub> CoI ( <b>3</b> )                 | 1                      | 7708.4                      |
| ( <sup>i</sup> PrNHPPH <sub>2</sub> ) <sub>3</sub> CoI ( <b>4</b> )                     | 1                      | 7708.0                      |
| HOZr(MesNP <sup>i</sup> Pr <sub>2</sub> ) <sub>3</sub> CoCO ( <b>5</b> )                | 0                      | 7707.8                      |
| [Co(CO) <sub>4</sub> ]Na                                                                | -1                     | No peak                     |
| (THF)Zr(MesNP <sup>i</sup> Pr <sub>2</sub> ) <sub>3</sub> CoN <sub>2</sub> ( <b>1</b> ) | -1                     | No peak                     |

**Figure S1.** Solid state XANES Co K-edge spectra from 7680.0 eV to 7760.0 eV of complex **1** and the Co<sup>-I</sup> complex Na[Co(CO)<sub>4</sub>].

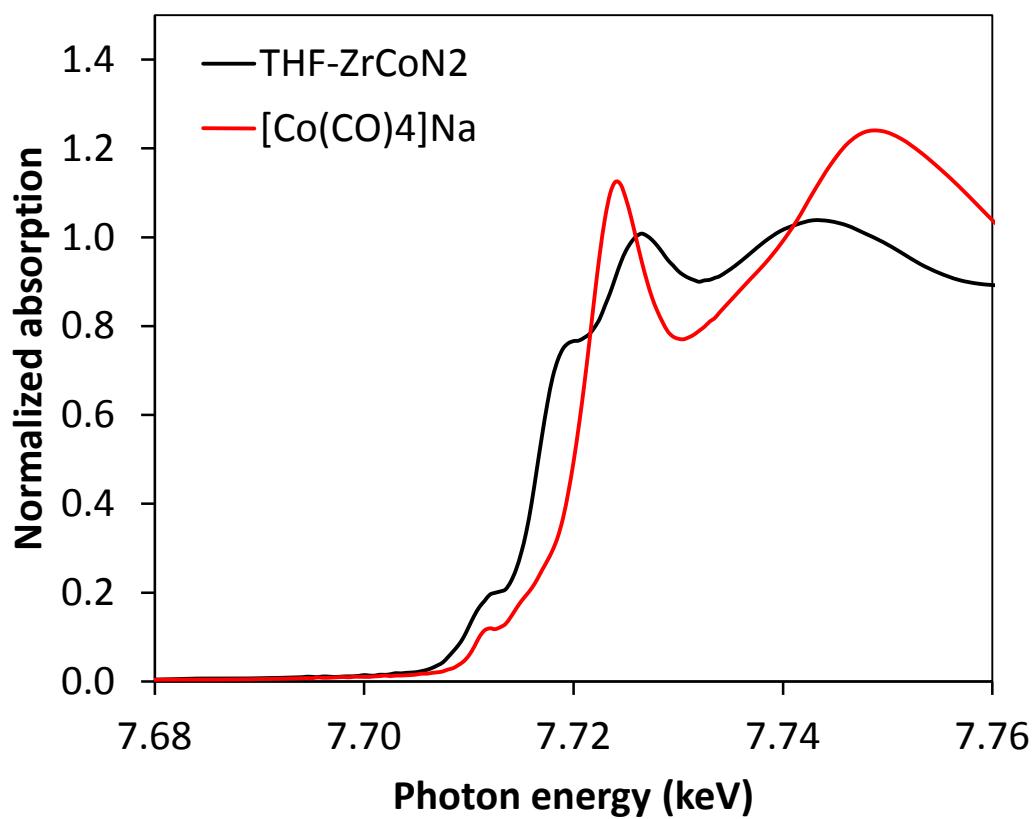

**Figure S2.** Solid state XANES Co K-edge spectra from 7680.0 eV to 7760.0 eV of complex **1** and the Co<sup>III</sup> complex Co(acac)<sub>3</sub> (acac = acetylacetonate). The Co<sup>III</sup> reference has a pre-edge feature at 7709.8 eV, while the pre-edge feature of **1** is absent (the small shoulder observed in this region is the leading edge of the XANES and not a pre-edge feature). The significantly higher energy of the edge of Co(acac)<sub>3</sub> is indicative of a higher oxidation state, as would be expected.

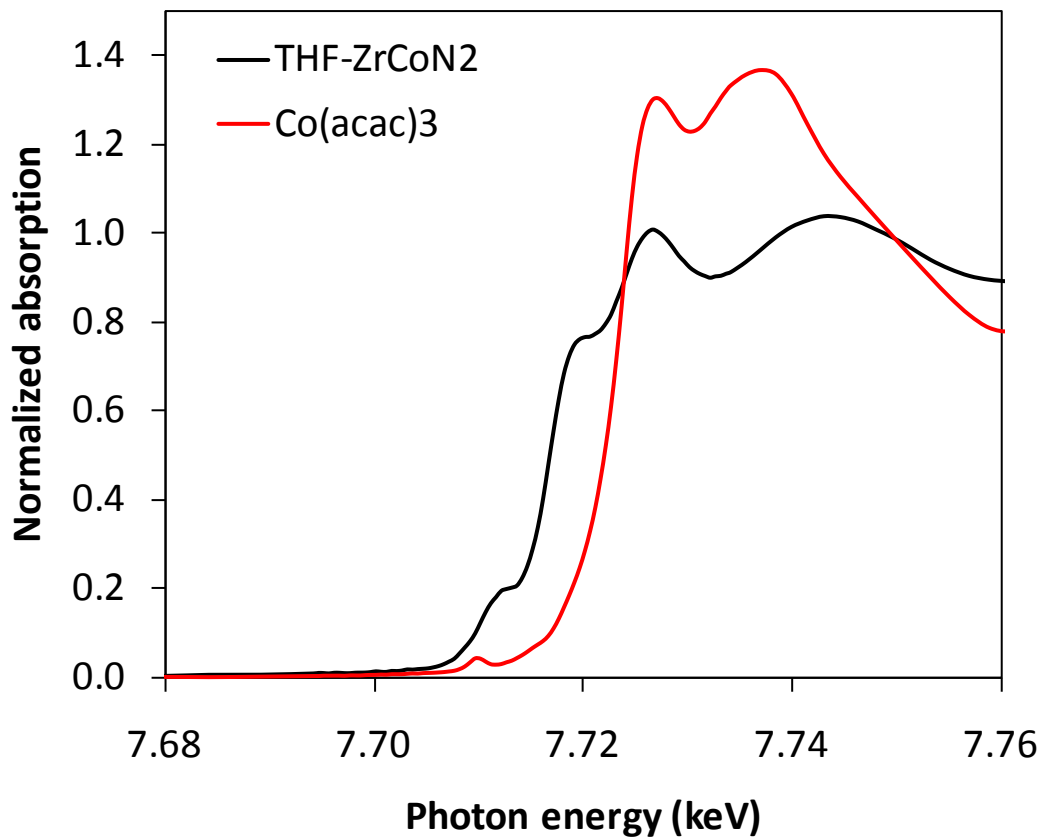

**Figure S3.** Solid state XANES Co K-edge spectrum from 7680.0 eV to 7760.0 eV of complex **1** (blue) and its first derivative (red). The position of the edge energy is denoted by a vertical dotted line.

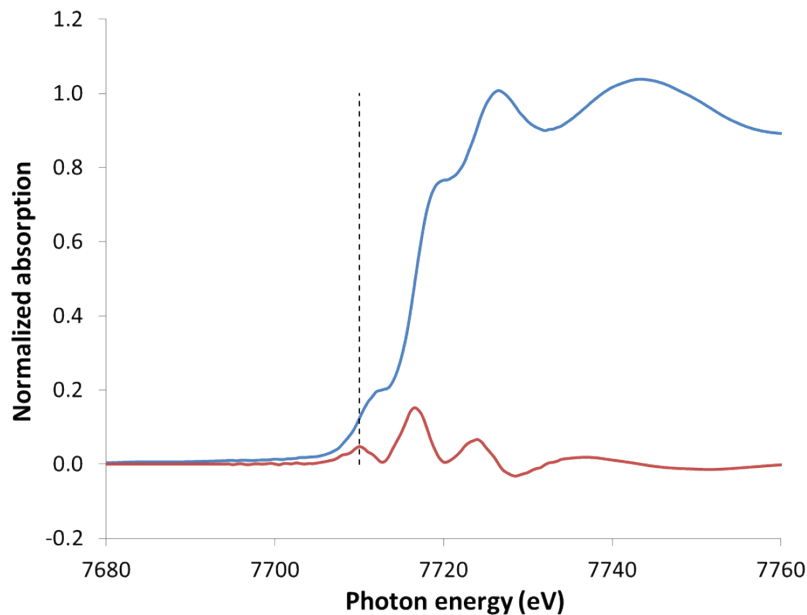

**Figure S4.** Solid state XANES Co K-edge spectrum from 7680.0 eV to 7760.0 eV of complex **3** (blue) and its first derivative (red). The position of the edge energy and the pre-edge energy are denoted by vertical dotted lines.

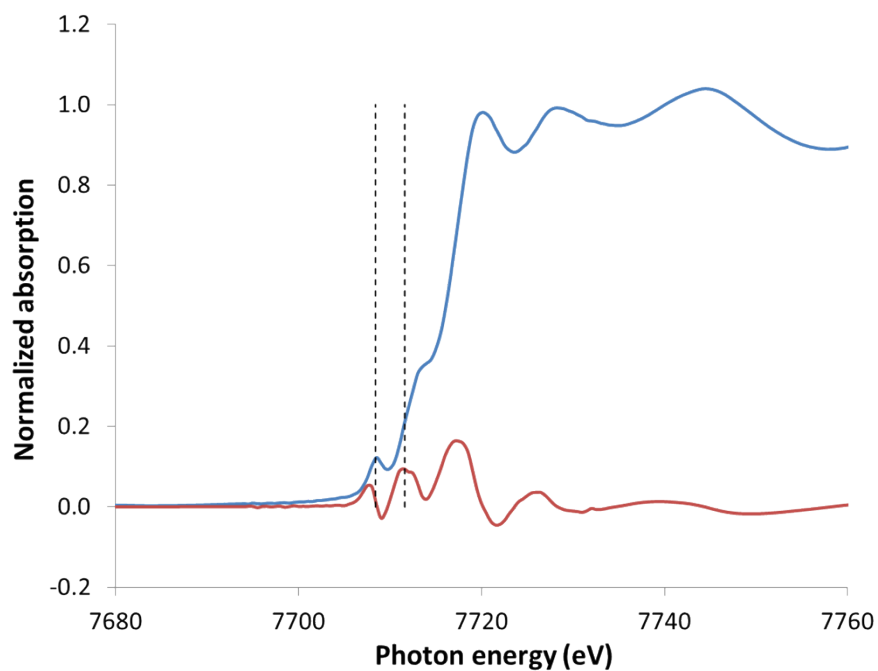

**Figure S5.** Solid state XANES Co K-edge spectrum from 7680.0 eV to 7760.0 eV of complex **4** (blue) and its first derivative (red). The position of the edge energy and the pre-edge energy are denoted by vertical dotted lines.

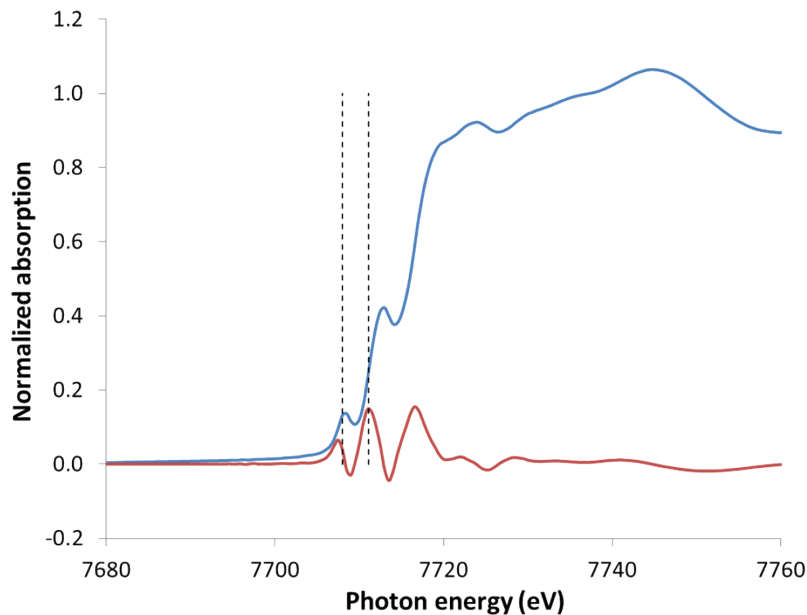

**Figure S6.** Solid state XANES Co K-edge spectrum from 7680.0 eV to 7760.0 eV of complex **5** (blue) and its first derivative (red). The position of the edge energy and the pre-edge energy are denoted by vertical dotted lines.

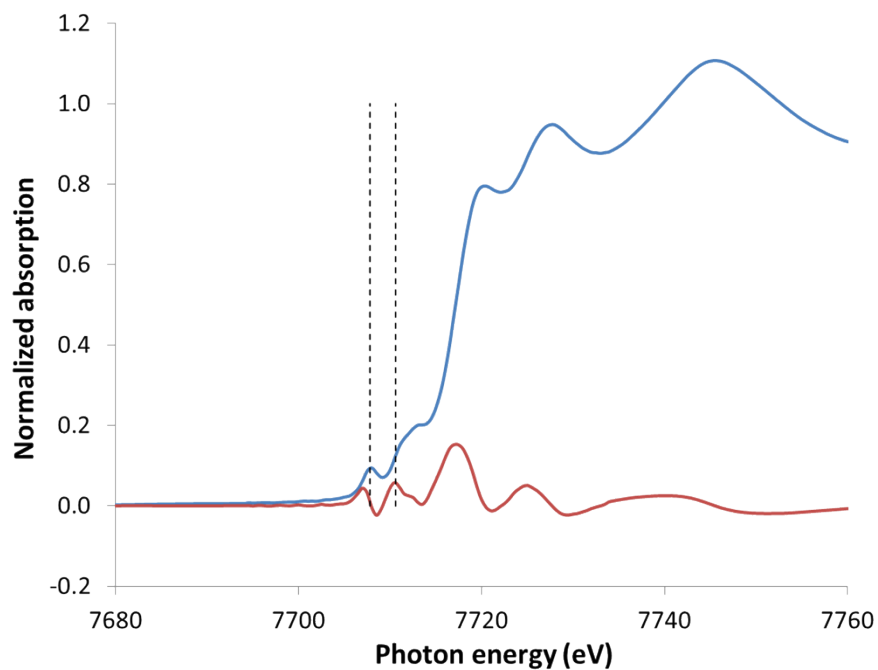

**Figure S7.** Solid state XANES Co K-edge spectrum from 7680.0 eV to 7760.0 eV of Na[Co(CO)<sub>4</sub>] (blue) and its first derivative (red). The position of the edge energy is denoted by a vertical dotted line.

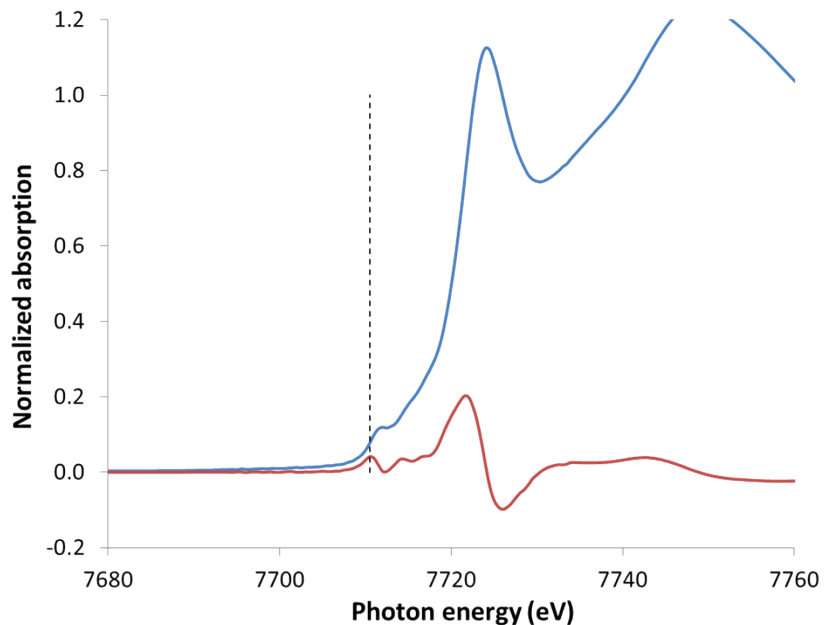

**Figure S8.** Solid state XANES Co K-edge spectrum from 7680.0 eV to 7760.0 eV of ClCo(PPh<sub>3</sub>)<sub>3</sub> (blue) and its first derivative (red). The position of the edge energy is denoted by a vertical dotted line.

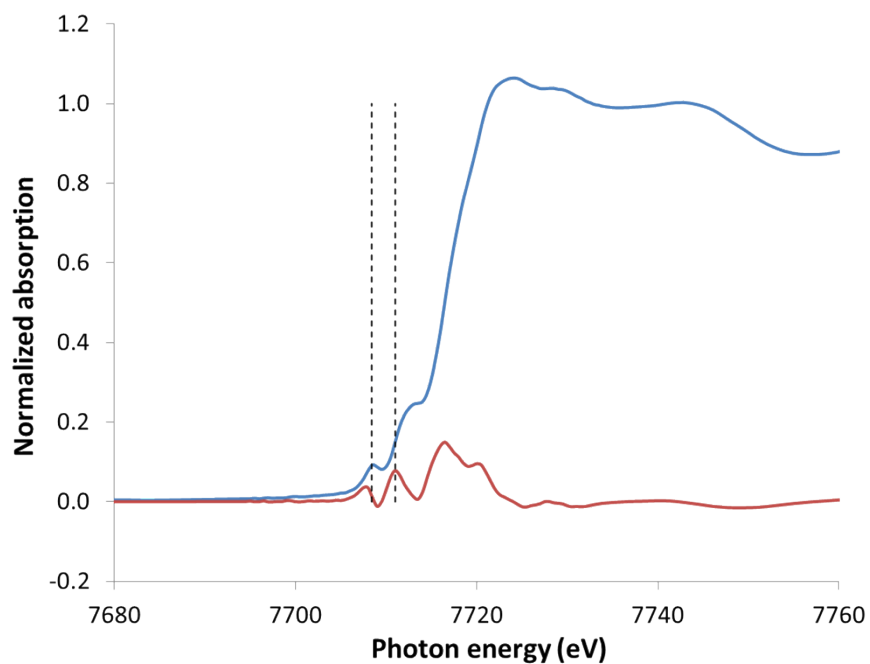

**Figure S9.** Solid state XANES Zr K-edge spectrum from 17960.0 eV to 18060.0 eV of complex **1** (blue) and its first derivative (red). The position of the edge energy is denoted by a vertical dotted line.

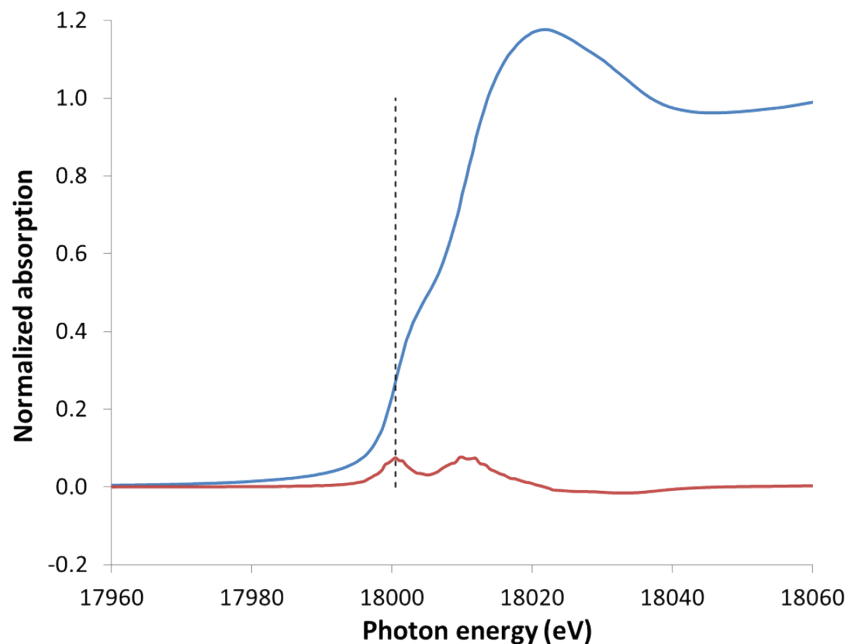

**Figure S10.** Solid state XANES Zr K-edge spectrum from 17960.0 eV to 18060.0 eV of complex **3** (blue) and its first derivative (red). The position of the edge energy is denoted by a vertical dotted line.

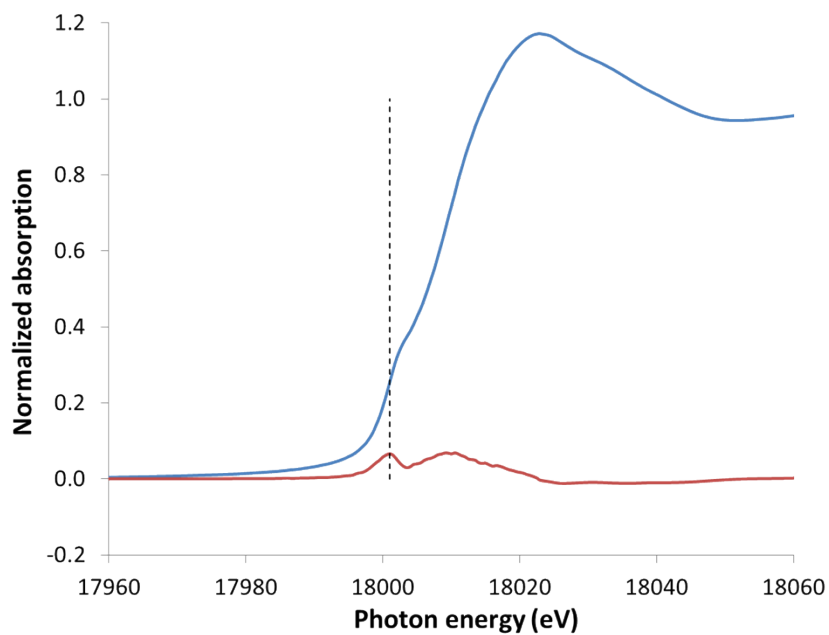



**Figure S11.** Solid state XANES Zr K-edge spectrum from 17960.0 eV to 18060.0 eV of complex **5** (blue) and its first derivative (red). The position of the edge energy is denoted by a vertical dotted line.

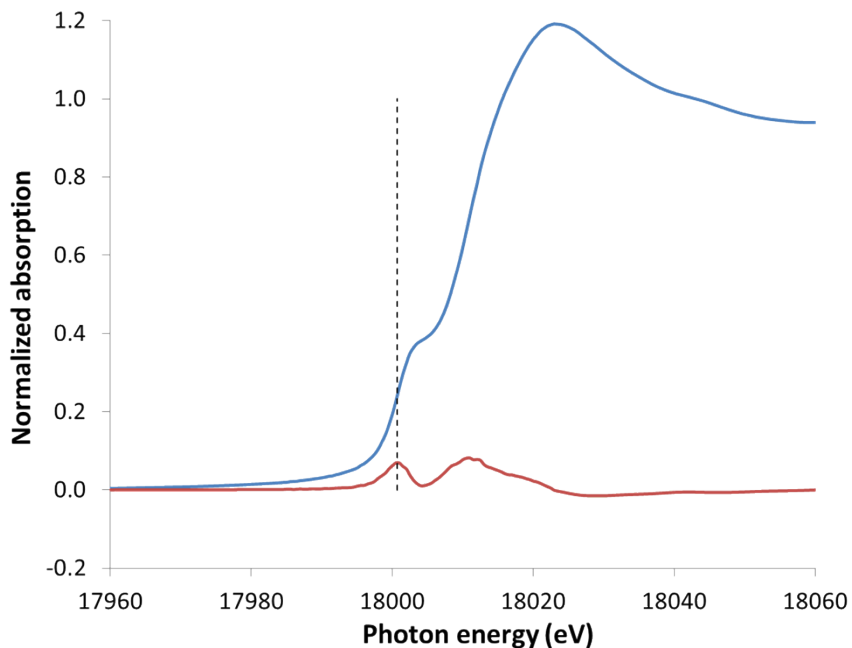

**Figure S12.** Solid state XANES Zr K-edge spectrum from 17960.0 eV to 18060.0 eV of complex **6** (blue) and its first derivative (red). The position of the edge energy is denoted by a vertical dotted line.

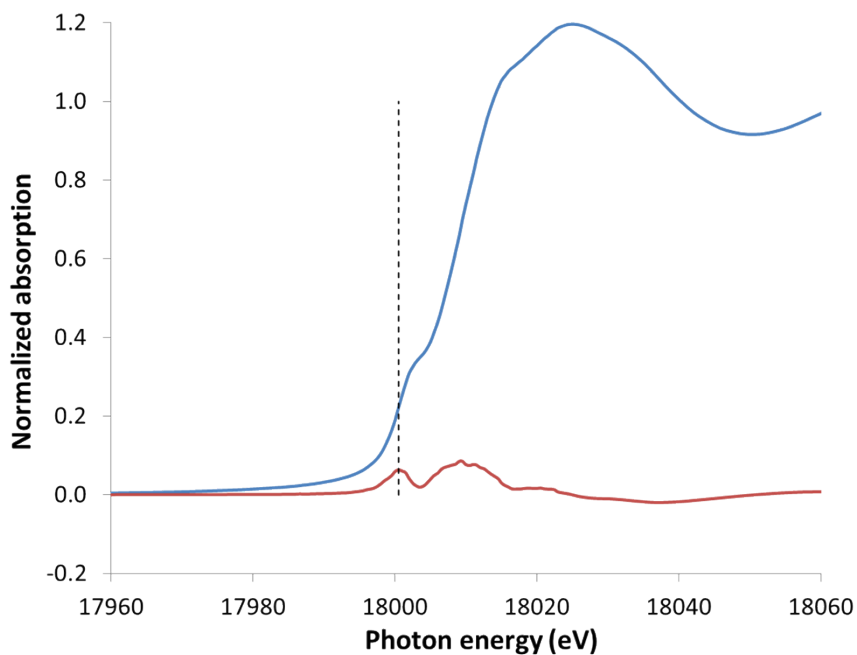

## **Gaussian 09 Full Reference**

Gaussian 09, Revision **A.1**, Frisch, M. J.; Trucks, G. W.; Schlegel, H. B.; Scuseria, G. E.; Robb, M. A.; Cheeseman, J. R.; Scalmani, G.; Barone, V.; Mennucci, B.; Petersson, G. A.; Nakatsuji, H.; Caricato, M.; Li, X.; Hratchian, H. P.; Izmaylov, A. F.; Bloino, J.; Zheng, G.; Sonnenberg, J. L.; Hada, M.; Ehara, M.; Toyota, K.; Fukuda, R.; Hasegawa, J.; Ishida, M.; Nakajima, T.; Honda, Y.; Kitao, O.; Nakai, H.; Vreven, T.; Montgomery, Jr., J. A.; Peralta, J. E.; Ogliaro, F.; Bearpark, M.; Heyd, J. J.; Brothers, E.; Kudin, K. N.; Staroverov, V. N.; Kobayashi, R.; Normand, J.; Raghavachari, K.; Rendell, A.; Burant, J. C.; Iyengar, S. S.; Tomasi, J.; Cossi, M.; Rega, N.; Millam, N. J.; Klene, M.; Knox, J. E.; Cross, J. B.; Bakken, V.; Adamo, C.; Jaramillo, J.; Gomperts, R.; Stratmann, R. E.; Yazyev, O.; Austin, A. J.; Cammi, R.; Pomelli, C.; Ochterski, J. W.; Martin, R. L.; Morokuma, K.; Zakrzewski, V. G.; Voth, G. A.; Salvador, P.; Dannenberg, J. J.; Dapprich, S.; Daniels, A. D.; Farkas, Ö.; Foresman, J. B.; Ortiz, J. V.; Cioslowski, J.; Fox, D. J. Gaussian, Inc., Wallingford CT, 2009.

**Table S2.** Comparison of selected interatomic distances derived from the DFT-optimized geometry and the experimentally determined geometry (X-ray crystallography) of **1**.<sup>1</sup>

|            | <b>Computed (DFT-optimized)</b> | <b>Experimental (X-ray)<sup>1</sup></b> |
|------------|---------------------------------|-----------------------------------------|
| Zr-Co      | 2.41 Å                          | 2.36 Å                                  |
| Zr-O       | 2.49 Å                          | 2.46 Å                                  |
| Zr-N (avg) | 2.18 Å                          | 2.15 Å                                  |
| Co-P (avg) | 2.26 Å                          | 2.22 Å                                  |
| Co-N       | 1.81 Å                          | 1.83 Å                                  |

---

<sup>1</sup> Greenwood, B. P.; Rowe, G. T.; Chen, C.-H.; Foxman, B. M.; Thomas, C. M. *J. Am. Chem. Soc.* **2010**, *132*, 44-45.
